# Supplementary material for: Heat-treated high-fat diet modifies gut microbiota and metabolic markers in apoe−/− mice
Source: Springer Nature journal article supplement (doi:10.1186/s12986-016-0083-0), 2016-03-12
Supplement: MOESM2 [file 25660442]

- HF
- HT
- LF

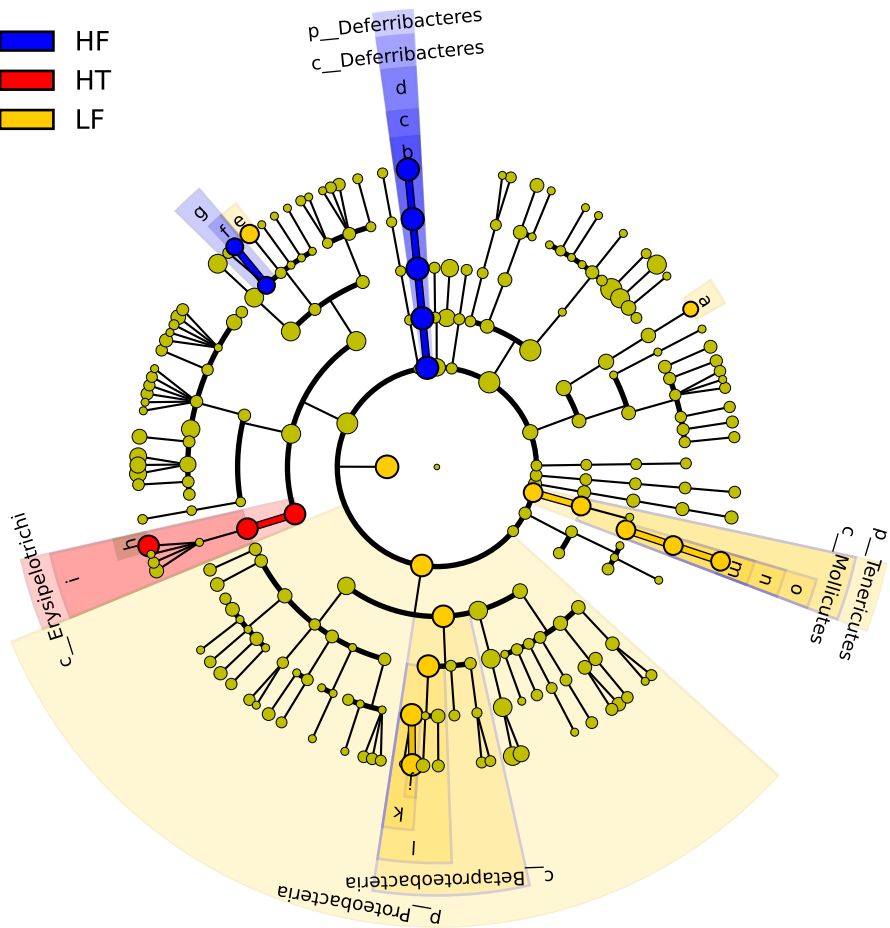

- a: g\_Adlercreutzia
- b: g\_Mucispirillum
- c: f\_Deferribacteraceae
- d: o\_Deferribacterales
- e: g\_Lactobacillus
- f: g\_Lactococcus
- g: f\_Streptococcaceae
- h: g\_Allobaculum
- i: o\_Erysipelotrichales
- j: g\_Sutterella
- k: f\_Alcaligenaceae
- l: o\_Burkholderiales
- m: g\_Anaeroplasmataceae
- n: f\_Anaeroplasmataceae
- o: o\_Anaeroplasmatales
